# Supplementary material for: Assessment of Metal Concentrations and Associations with Pulmonary Function among Children with Asthma in Chicago, Illinois
Source: MDPI journal article supplement (doi:10.3390/ijerph18147279), 2021-07-07
Supplement: s1 [file s1]

**Supplemental Table S1.** Spearman correlation coefficients for suite of 17 trace and toxic metals measured in 75 toenail samples

[illegible]

**Supplemental Table S2.** Associations between toenail metals concentrations and pulmonary function parameters among children with asthma (Hispanic only; n=35)

| Exposure (µg/g)    | ln (FEV1, L) <sup>a</sup> | ln (FVC, L) <sup>a</sup> | ln (FEV1:FVC) <sup>a</sup> | ln (FEF 25-75, L/sec) <sup>a</sup> |
|--------------------|---------------------------|--------------------------|----------------------------|------------------------------------|
|                    | β (SE)                    | β (SE)                   | β (SE)                     | β (SE)                             |
| Adjacent Community | -0.003 (0.07)             | 0.0005 (0.06)            | -0.01 (0.05)               | -0.05 (0.16)                       |
| P value            | 0.96                      | 0.99                     | 0.89                       | 0.73                               |
| Aluminum ≥ 13.4    | -0.04 (0.05)              | 0.01 (0.04)              | -0.05 (0.03)               | -0.13 (0.11)                       |
| P value            | 0.45                      | 0.74                     | 0.13                       | 0.23                               |
| Arsenic ≥ 0.15     | -0.004 (0.05)             | 0.03 (0.04)              | -0.04 (0.03)               | -0.13 (0.11)                       |
| P value            | 0.93                      | 0.40                     | 0.26                       | 0.21                               |
| Cadmium ≥ 0.03     | <b>-0.09 (0.04)</b>       | -0.04 (0.04)             | -0.04 (0.03)               | -0.15 (0.10)                       |
| P value            | <b>0.05</b>               | 0.27                     | 0.17                       | 0.15                               |
| Cobalt ≥ 0.05      | -0.02 (0.05)              | 0.04 (0.04)              | <b>-0.06 (0.03)</b>        | -0.15 (0.11)                       |
| P value            | 0.62                      | 0.34                     | <b>0.05</b>                | 0.16                               |
| Chromium ≥ 0.31    | -0.03 (0.04)              | -0.004 (0.04)            | -0.03 (0.03)               | -0.07 (0.10)                       |
| P value            | 0.44                      | 0.92                     | 0.32                       | 0.48                               |
| Copper ≥ 4.5       | <b>-0.12 (0.04)</b>       | -0.05 (0.04)             | <b>-0.07 (0.03)</b>        | <b>-0.28 (0.10)</b>                |
| P value            | <b>0.004</b>              | 0.19                     | <b>0.02</b>                | <b>0.004</b>                       |
| Iron ≥ 53.9        | -0.002 (0.05)             | -0.002 (0.04)            | -0.0001 (0.03)             | -0.04 (0.12)                       |
| P value            | 0.97                      | 0.96                     | 0.99                       | 0.73                               |
| Mercury ≥ 0.03     | -0.05 (0.05)              | -0.03 (0.04)             | -0.02 (0.04)               | -0.08 (0.12)                       |
| P value            | 0.37                      | 0.52                     | 0.59                       | 0.49                               |
| Manganese ≥ 1.1    | <b>-0.14 (0.05)</b>       | -0.06 (0.04)             | <b>-0.08 (0.03)</b>        | <b>-0.35 (0.10)</b>                |
| P value            | <b>0.002</b>              | 0.15                     | <b>0.02</b>                | <b>0.001</b>                       |
| Molybdenum ≥ 0.02  | -0.03 (0.04)              | -0.06 (0.04)             | 0.03 (0.03)                | 0.03 (0.10)                        |
| P value            | 0.57                      | 0.10                     | 0.30                       | 0.76                               |
| Nickel ≥ 15.2      | 0.04 (0.05)               | <b>0.07 (0.04)</b>       | -0.03 (0.03)               | -0.05 (0.11)                       |
| P value            | 0.45                      | <b>0.07</b>              | 0.30                       | 0.64                               |
| Lead ≥ 1.2         | -0.02 (0.05)              | -0.07 (0.04)             | 0.05 (0.04)                | 0.10 (0.12)                        |
| P value            | 0.73                      | 0.12                     | 0.18                       | 0.42                               |
| Antimony ≥ 0.14    | -0.01 (0.05)              | -0.001 (0.04)            | -0.01 (0.04)               | -0.08 (0.12)                       |
| P value            | 0.84                      | 0.98                     | 0.75                       | 0.51                               |
| Selenium ≥ 0.88    | -0.07 (0.05)              | <b>-0.12 (0.04)</b>      | 0.05 (0.04)                | 0.04 (0.12)                        |
| P value            | 0.18                      | <b>0.003</b>             | 0.16                       | 0.72                               |
| Tin ≥ 0.27         | 0.04 (0.05)               | 0.01 (0.04)              | 0.04 (0.03)                | 0.14 (0.11)                        |
| P value            | 0.36                      | 0.88                     | 0.25                       | 0.19                               |
| Vanadium ≥ 0.02    | <b>-0.09 (0.04)</b>       | <b>-0.08 (0.04)</b>      | -0.004 (0.03)              | -0.10 (0.10)                       |
| P value            | <b>0.04</b>               | <b>0.02</b>              | 0.89                       | 0.35                               |
| Zinc ≥ 98.8        | -0.05 (0.05)              | -0.04 (0.04)             | -0.01 (0.03)               | -0.06 (0.11)                       |
| P value            | 0.33                      | 0.34                     | 0.84                       | 0.57                               |

<sup>a</sup> Adjusted for sex, age (continuous, years), body mass index (continuous, kg/m<sup>2</sup>), height (continuous, centimeters), community area (adjacent, comparison), and school.  
P value <0.1 shown in bold text.

**Supplemental Table S3.** Associations between toenail metals concentrations and percent predicted pulmonary function parameters among children with asthma (n=39)

| Exposure (µg/g)    | FEV1 % <sup>a</sup> | FVC % <sup>a</sup> | FEV1:FVC % <sup>a</sup> | FEF 25-75% <sup>a</sup> |
|--------------------|---------------------|--------------------|-------------------------|-------------------------|
|                    | β (SE)              | β (SE)             | β (SE)                  | β (SE)                  |
| Adjacent Community | 0.58 (5.4)          | -2.8 (4.7)         | 2.8 (4.0)               | 2.1 (12.3)              |
| P value            | 0.91                | 0.55               | 0.47                    | 0.86                    |
| Aluminum ≥ 13.4    | -3.5 (4.0)          | 0.53 (3.5)         | -3.8 (2.9)              | -6.9 (9.2)              |
| P value            | 0.39                | 0.88               | 0.19                    | 0.45                    |
| Arsenic ≥ 0.15     | -1.5 (3.9)          | 2.0 (3.4)          | -3.1 (2.8)              | -11.5 (8.8)             |
| P value            | 0.70                | 0.57               | 0.27                    | 0.19                    |
| Cadmium ≥ 0.03     | -6.3 (3.9)          | -3.5 (3.4)         | -2.4 (2.9)              | -11.4 (8.9)             |
| P value            | 0.11                | 0.30               | 0.40                    | 0.20                    |
| Cobalt ≥ 0.05      | -0.81 (4.1)         | 3.7 (3.5)          | -4.6 (2.9)              | -5.0 (9.2)              |
| P value            | 0.84                | 0.29               | 0.11                    | 0.59                    |
| Chromium ≥ 0.31    | -3.2 (3.9)          | 0.48 (3.4)         | -3.2 (2.8)              | -6.1 (8.8)              |
| P value            | 0.41                | 0.89               | 0.25                    | 0.49                    |
| Copper ≥ 4.5       | <b>-9.0 (3.8)</b>   | -3.7 (3.4)         | <b>-5.4 (2.8)</b>       | <b>-20.6 (8.5)</b>      |
| P value            | <b>0.02</b>         | 0.29               | <b>0.05</b>             | <b>0.01</b>             |
| Iron ≥ 53.9        | -1.3 (3.9)          | 0.12 (3.3)         | -1.4 (2.8)              | -7.2 (8.7)              |
| P value            | 0.74                | 0.97               | 0.63                    | 0.41                    |
| Mercury ≥ 0.03     | -0.61 (4.0)         | -1.2 (3.5)         | 0.77 (3.0)              | 2.1 (9.2)               |
| P value            | 0.88                | 0.72               | 0.79                    | 0.82                    |
| Manganese ≥ 1.1    | <b>-9.1 (3.9)</b>   | -3.3 (3.6)         | <b>-5.4 (2.9)</b>       | <b>-24.9 (8.6)</b>      |
| P value            | <b>0.02</b>         | 0.36               | <b>0.06</b>             | <b>0.004</b>            |
| Molybdenum ≥ 0.02  | -3.0 (4.0)          | <b>-6.2 (3.3)</b>  | 3.3 (2.8)               | 0.85 (9.0)              |
| P value            | 0.44                | <b>0.06</b>        | 0.24                    | 0.92                    |
| Nickel ≥ 15.2      | 2.0 (4.0)           | <b>6.4 (3.3)</b>   | -4.5 (2.8)              | -7.3 (9.0)              |
| P value            | 0.62                | <b>0.05</b>        | 0.11                    | 0.41                    |
| Lead ≥ 1.2         | -0.28 (4.2)         | -5.2 (3.5)         | <b>5.3 (2.9)</b>        | 7.6 (9.4)               |
| P value            | 0.94                | 0.14               | <b>0.07</b>             | 0.42                    |
| Antimony ≥ 0.14    | -0.41 (4.4)         | 2.3 (3.8)          | -1.5 (3.2)              | -6.8 (10.0)             |
| P value            | 0.92                | 0.55               | 0.63                    | 0.49                    |
| Selenium ≥ 0.88    | -3.6 (4.3)          | <b>-8.8 (3.5)</b>  | <b>5.3 (3.0)</b>        | 4.8 (9.8)               |
| P value            | 0.40                | <b>0.01</b>        | <b>0.08</b>             | 0.62                    |
| Tin ≥ 0.27         | 1.7 (3.8)           | -2.3 (3.3)         | 4.2 (2.7)               | 8.3 (8.6)               |
| P value            | 0.66                | 0.48               | 0.12                    | 0.33                    |
| Vanadium ≥ 0.02    | <b>-8.6 (3.8)</b>   | <b>-8.0 (3.2)</b>  | -0.39 (2.9)             | -8.2 (9.0)              |
| P value            | <b>0.02</b>         | <b>0.01</b>        | 0.89                    | 0.36                    |
| Zinc ≥ 98.8        | -4.4 (4.2)          | -2.9 (3.6)         | -1.3 (3.1)              | -8.5 (9.5)              |
| P value            | 0.29                | 0.42               | 0.67                    | 0.37                    |

<sup>a</sup> Adjusted for body mass index (continuous, kg/m<sup>2</sup>), height (continuous, centimeters), community area (adjacent, comparison), and school.

P value <0.1 shown in bold text.

**Supplemental Table S4.** Associations between toenail metals concentrations and percent predicted pulmonary function parameters among children with asthma (Hispanic only; n=35)

| Exposure (µg/g)    | FEV1 % <sup>a</sup> | FVC % <sup>a</sup> | FEV1:FVC % <sup>a</sup> | FEF 25-75% <sup>a</sup> |
|--------------------|---------------------|--------------------|-------------------------|-------------------------|
|                    | β (SE)              | β (SE)             | β (SE)                  | β (SE)                  |
| Adjacent Community | 2.1 (5.9)           | -0.65 (5.0)        | 2.5 (4.4)               | 1.7 (13.6)              |
| P value            | 0.72                | 0.90               | 0.56                    | 0.90                    |
| Aluminum ≥ 13.4    | -3.1 (4.3)          | 1.5 (3.7)          | -4.2 (3.2)              | -6.8 (10.0)             |
| P value            | 0.47                | 0.69               | 0.18                    | 0.50                    |
| Arsenic ≥ 0.15     | 0.07 (4.3)          | 3.6 (3.7)          | -2.9 (3.2)              | -10.3 (10.0)            |
| P value            | 0.99                | 0.32               | 0.36                    | 0.30                    |
| Cadmium ≥ 0.03     | -6.6 (4.1)          | -3.6 (3.6)         | -2.6 (3.2)              | -11.3 (9.8)             |
| P value            | 0.11                | 0.31               | 0.42                    | 0.24                    |
| Cobalt ≥ 0.05      | -0.37 (4.3)         | 4.6 (3.6)          | -4.9 (3.1)              | -4.5 (10.0)             |
| P value            | 0.93                | 0.20               | 0.11                    | 0.65                    |
| Chromium ≥ 0.31    | -3.3 (4.2)          | -0.002 (3.6)       | -2.9 (3.1)              | -5.6 (9.7)              |
| P value            | 0.43                | 0.99               | 0.35                    | 0.56                    |
| Copper ≥ 4.5       | <b>-9.9 (4.0)</b>   | -4.9 (3.6)         | <b>-5.3 (3.1)</b>       | <b>-21.6 (9.4)</b>      |
| P value            | <b>0.01</b>         | 0.17               | <b>0.09</b>             | <b>0.02</b>             |
| Iron ≥ 53.9        | -1.4 (4.2)          | -0.74 (3.6)        | -0.78 (3.1)             | -6.7 (9.7)              |
| P value            | 0.74                | 0.84               | 0.80                    | 0.49                    |
| Mercury ≥ 0.03     | -0.85 (4.5)         | -0.54 (3.8)        | 0.03 (3.3)              | 0.80 (10.4)             |
| P value            | 0.85                | 0.89               | 0.99                    | 0.94                    |
| Manganese ≥ 1.1    | <b>-11.5 (4.3)</b>  | -5.7 (3.9)         | <b>-5.7 (3.4)</b>       | <b>-28.9 (9.9)</b>      |
| P value            | <b>0.008</b>        | 0.15               | <b>0.09</b>             | <b>0.004</b>            |
| Molybdenum ≥ 0.02  | -2.6 (4.2)          | -5.4 (3.5)         | 3.3 (3.1)               | 0.44 (9.8)              |
| P value            | 0.54                | 0.12               | 0.29                    | 0.96                    |
| Nickel ≥ 15.2      | 2.5 (4.3)           | <b>6.6 (3.5)</b>   | -4.2 (3.1)              | -6.8 (9.9)              |
| P value            | 0.56                | <b>0.06</b>        | 0.17                    | 0.49                    |
| Lead ≥ 1.2         | 0.35 (4.6)          | -5.3 (3.8)         | <b>6.2 (3.3)</b>        | 10.2 (10.6)             |
| P value            | 0.94                | 0.17               | <b>0.06</b>             | 0.34                    |
| Antimony ≥ 0.14    | -2.1 (4.7)          | 0.77 (4.0)         | -1.9 (3.5)              | -9.5 (10.9)             |
| P value            | 0.66                | 0.85               | 0.58                    | 0.38                    |
| Selenium ≥ 0.88    | -5.1 (4.5)          | <b>-10.8 (3.5)</b> | 5.5 (3.3)               | 3.0 (10.8)              |
| P value            | 0.26                | <b>0.002</b>       | 0.10                    | 0.78                    |
| Tin ≥ 0.27         | 4.4 (4.2)           | -0.21 (3.6)        | <b>5.1 (3.0)</b>        | 10.9 (9.7)              |
| P value            | 0.29                | 0.95               | <b>0.09</b>             | 0.26                    |
| Vanadium ≥ 0.02    | <b>-8.7 (4.0)</b>   | <b>-8.0 (3.4)</b>  | -0.36 (3.2)             | -7.9 (9.8)              |
| P value            | <b>0.03</b>         | <b>0.02</b>        | 0.91                    | 0.42                    |
| Zinc ≥ 98.8        | -4.1 (4.5)          | -3.1 (3.9)         | -0.77 (3.4)             | -8.2 (10.6)             |
| P value            | 0.37                | 0.42               | 0.82                    | 0.43                    |

<sup>a</sup> Adjusted for body mass index (continuous, kg/m<sup>2</sup>), height (continuous, centimeters), community area (adjacent, comparison), and school.

P value <0.1 shown in bold text.

**Supplemental Table S5.** Associations between toenail metal concentrations and asthma control among children with asthma (Hispanic only; n=70)

| Exposure (µg/g)    | Uncontrolled<br>ACT ≤ 19<br>(n=16) | Controlled<br>ACT >19<br>(n=55) | OR (95% CI) <sup>a</sup> |
|--------------------|------------------------------------|---------------------------------|--------------------------|
|                    | N (%)                              | N (%)                           |                          |
| Adjacent Community | 9 (56.3)                           | 26 (48.1)                       | 1.3 (0.4, 4.5)           |
| Aluminum ≥ 12.3    | 10 (62.5)                          | 23 (42.6)                       | 2.3 (0.9, 6.0)           |
| Arsenic ≥ 0.15     | 10 (62.5)                          | 24 (44.4)                       | 1.8 (0.6, 5.9)           |
| Cadmium ≥ 0.03     | 9 (56.3)                           | 24 (44.4)                       | 1.5 (0.5, 4.7)           |
| Cobalt ≥ 0.04      | 10 (62.5)                          | 23 (42.6)                       | 2.5 (0.7, 9.6)           |
| Chromium ≥ 0.29    | 9 (56.3)                           | 26 (48.1)                       | 1.3 (0.2, 10.0)          |
| Copper ≥ 4.5       | 12 (75.0)                          | 24 (44.4)                       | <b>4.5 (1.0, 20.4)</b>   |
| Iron ≥ 51.2        | 11 (68.8)                          | 25 (46.3)                       | 3.2 (0.8, 12.2)          |
| Mercury ≥ 0.03     | 9 (56.3)                           | 25 (46.3)                       | 1.8 (0.4, 6.9)           |
| Manganese ≥ 1.1    | 9 (56.3)                           | 26 (48.1)                       | 1.1 (0.3, 4.3)           |
| Molybdenum ≥ 0.02  | 10 (62.5)                          | 22 (40.7)                       | 2.6 (0.7, 8.9)           |
| Nickel ≥ 13.4      | 12 (75.0)                          | 23 (42.6)                       | <b>7.3 (1.9, 28.2)</b>   |
| Lead ≥ 1.2         | 9 (56.3)                           | 25 (46.3)                       | 1.6 (0.6, 4.3)           |
| Antimony ≥ 0.14    | 10 (62.5)                          | 23 (42.6)                       | 2.1 (0.7, 6.6)           |
| Selenium ≥ 0.87    | 6 (37.5)                           | 28 (51.8)                       | 0.5 (0.1, 1.6)           |
| Tin ≥ 0.27         | 7 (43.7)                           | 27 (50.0)                       | 0.6 (0.2, 1.3)           |
| Vanadium ≥ 0.02    | 9 (56.3)                           | 24 (44.4)                       | 1.5 (0.7, 3.3)           |
| Zinc ≥ 96.8        | 9 (56.3)                           | 26 (48.1)                       | 1.6 (0.4, 6.9)           |

<sup>a</sup> Adjusted for sex, age (continuous, years), body mass index (continuous, kg/m<sup>2</sup>), community area (adjacent, comparison), and clustering by school.  
P value <0.1 shown in bold text.
